# Supplementary material for: Co-PBK: a computational biomonitoring tool for assessing chronic internal exposure to chemicals and metabolites
Source: Royal Society of Chemistry journal article supplement (doi:10.1039/d3em00396e), 2023-01-01
Supplement: d3em00396e1.xlsx [file d3em00396e1.xlsx]

## Sheet: Parent compound
Physiological inputs			Composition inputs				Parent compound property				Partition coefficients (dimensionless)								Liver compartment (1/d)				Lung compartment (1/d)			Kidney compartment (1/d)			Fat compartment (1/d)		Muscle compartment (1/d)		Blood compartment (1/d)						Uptake efficiency (dimensionless)			ADD (mg/kg/d)			Steady-state mass (route-specific m can be calculated by setting route-specific ADDs as zero) (mg)
Input variable	Unit	Value	Tissue/elimination media	Contents (g g-1)			Chemical	Log Kow	Kow (dimensionless)	KAw (dimensionless)	K_(Liver-Bile)^P	K_(Liver-B)^P	K_(Lung-A)^P	K_(Lung-B)^P	K_(Kidney-U)^P	K_(Kidney-B)^P	K_(Fat-B)^P	K_(Muscle-B)^P	k_(BioT,Liver)^P	k_(Liver→Bile)^P	k_(Liver→B)^P	k_(B→Liver)^P	k_(Lung→A)^P	k_(Lung→B)^P	k_(B→Lung)^P	k_(Kidney→U)^P	k_(Kidney→B)^P	k_(B→Kidney)^P	k_(Fat→B)^P	k_(B→Fat)^P	k_(Muscle→B)^P	k_(B→Muscle)^P	k_(Liver→B)^P	k_(Lung→B)^P	k_(Kidney→B)^P	k_(Fat→B)^P	k_(Muscle→B)^P	∑k_(B→Tissue,j)^P	Oral	Inhalation	Dermal	Oral	Inhalation	Dermal	m_(P,Blood)^s	m_(P,Liver)^s	m_(P,Lung)^s	m_(P,Kidney)^s	m_(P,Fat)^s
Exhalation rate	kg d-1	10.4		Lipid (fat)	NLP	Water	Naphthalene	3.3	1995.26	0.011215	7.00715	7.50164	5.1542	3.91929	35.638	2.75463	156.489	1.43341	7.776	0.0475705	121.011	333.469	1.83434	50.1018	44.0816	0.1403	1594.89	268.98	0.159329	76.3265	56.0868	746.531	121.011	50.1018	1594.89	0.159329	56.0868	1469.39	0.99994	1	1	1	1	1	9.31129	24.6443	9.25091	1.57022	4460.56
Urine excretion rate	kg d-1	1.5	Urine	0	0	0.95
Bile excretion rate	kg d-1	0.6	Bile	0.005	0.002	0.97
Body mass	kg	70	Blood	0.002	0.078	0.92
Blood mass	kg	4.9	Liver	0.03	0.23	0.73
Liver mass	kg	1.8	Kidney	0.007	0.193	0.79
Kidney mass	kg	0.3	Muscle	0	0.2	0.79
Lung mass	kg	1.1	Fat	0.8	0	0.2
Fat mass	kg	15	Lung	0.015	0.134	0.837
Muscle mass	kg	45.5
Liver blood flow	kg d-1	1634
Kidney blood flow	kg d-1	1318
Lung blood flow	kg d-1	216
Fat blood flow	kg d-1	374
Muscle blood flow	kg d-1	3658
[truncated: 1 more columns]

## Sheet: Metabolite 1
Physiological inputs			Composition inputs				Metabolite property				Partition coefficients (dimensionless)								Kidney-urine partition	Production from the liver	Liver compartment (1/d)				Lung compartment (1/d)			Kidney compartment (1/d)			Fat compartment (1/d)		Muscle compartment (1/d)		Blood compartment (1/d)						Steady-state mass (route-specific m can be calculated by setting route-specific ADDs as zero) (mg)						Biotransformation factor (Urine) (d/kg)	Urine measurement value (mg/L)	IR
Input variable	Unit	Value	Tissue/elimination media	Contents (g g-1)			Chemical	Log Kow	Kow (dimensionless)	KAw (dimensionless)	K_(Liver-Bile)^M	K_(Liver-B)^M	K_(Lung-A)^M	K_(Lung-B)^M	K_(Kidney-U)^M	K_(Kidney-B)^M	K_(Fat-B)^M	K_(Muscle-B)^M	K_(Kidney-U)^M	k_(PR,Liver)^M	k_(BioT,Liver)^M	k_(Liver→Bile)^M	k_(Liver→B)^M	k_(B→Liver)^M	k_(Lung→A)^M	k_(Lung→B)^M	k_(B→Lung)^M	k_(Kidney→U)^M	k_(Kidney→B)^M	k_(B→Kidney)^M	k_(Fat→B)^M	k_(B→Fat)^M	k_(Muscle→B)^M	k_(B→Muscle)^M	k_(Liver→B)^M	k_(Lung→B)^M	k_(Kidney→B)^M	k_(Fat→B)^M	k_(Muscle→B)^M	∑k_(B→Tissue,j)^M	m_(M,Blood)^s	m_(M,Liver)^s	m_(M,Lung)^s	m_(M,Kidney)^s	m_(M,Fat)^s	m_(M,Muscle)^s	〖BF〗_(P→M,i,Urine,r)	c_urine, 1-OHN	IR, 1-OHN
Exhalation rate	kg d-1	10.4		Lipid (fat)	NLP	Water	1-OHN	2.85	707.946	1.47e-09	6.26783	6.69796	1.43931e+07	3.55873	13.1813	2.52749	137.767	1.36456	13.1813	0.5	0	0.0531817	135.531	333.469	6.56881e-07	55.178	44.0816	0.379324	1738.22	268.98	0.180982	76.3265	58.9169	746.531	135.531	55.178	1738.22	0.180982	58.9169	1469.39	65.0035	159.968	51.9313	10.0567	27414.3	823.654	0.036331		0
Urine excretion rate	kg d-1	1.5	Urine	0	0	0.95
Bile excretion rate	kg d-1	0.6	Bile	0.005	0.002	0.97
Body mass	kg	70	Blood	0.002	0.078	0.92
Blood mass	kg	4.9	Liver	0.03	0.23	0.73
Liver mass	kg	1.8	Kidney	0.007	0.193	0.79
Kidney mass	kg	0.3	Muscle	0	0.2	0.79
Lung mass	kg	1.1	Fat	0.8	0	0.2
Fat mass	kg	15	Lung	0.015	0.134	0.837
Muscle mass	kg	45.5
Liver blood flow	kg d-1	1634
Kidney blood flow	kg d-1	1318
Lung blood flow	kg d-1	216
Fat blood flow	kg d-1	374
Muscle blood flow	kg d-1	3658
[truncated: 1 more columns]

## Sheet: Metabolite 2
Physiological inputs			Composition inputs				Metabolite property				Partition coefficients (dimensionless)								Kidney-urine partition	Production from the liver	Liver compartment (1/d)				Lung compartment (1/d)			Kidney compartment (1/d)			Fat compartment (1/d)		Muscle compartment (1/d)		Blood compartment (1/d)						Steady-state mass (route-specific m can be calculated by setting route-specific ADDs as zero) (mg)						Biotransformation factor (Urine) (d/kg)	Urine measurement value (mg/L)	IR
Input variable	Unit	Value	Tissue/elimination media	Contents (g g-1)			Chemical	Log Kow	Kow (dimensionless)	KAw (dimensionless)	K_(Liver-Bile)^M	K_(Liver-B)^M	K_(Lung-A)^M	K_(Lung-B)^M	K_(Kidney-U)^M	K_(Kidney-B)^M	K_(Fat-B)^M	K_(Muscle-B)^M	K_(Kidney-U)^M	k_(PR,Liver)^M	k_(BioT,Liver)^M	k_(Liver→Bile)^M	k_(Liver→B)^M	k_(B→Liver)^M	k_(Lung→A)^M	k_(Lung→B)^M	k_(B→Lung)^M	k_(Kidney→U)^M	k_(Kidney→B)^M	k_(B→Kidney)^M	k_(Fat→B)^M	k_(B→Fat)^M	k_(Muscle→B)^M	k_(B→Muscle)^M	k_(Liver→B)^M	k_(Lung→B)^M	k_(Kidney→B)^M	k_(Fat→B)^M	k_(Muscle→B)^M	∑k_(B→Tissue,j)^M	m_(M,Blood)^s	m_(M,Liver)^s	m_(M,Lung)^s	m_(M,Kidney)^s	m_(M,Fat)^s	m_(M,Muscle)^s	〖BF〗_(P→M,i,Urine,r)	c_urine, 1-OHN	IR, 1-OHN
Exhalation rate	kg d-1	10.4		Lipid (fat)	NLP	Water	2-OHN	2.7	501.187	6.71e-10	5.88027	6.27783	2.276e+07	3.37025	9.57455	2.40875	127.98	1.32857	9.57455	0.5	0	0.0566868	144.601	333.469	4.15403e-07	58.2638	44.0816	0.522218	1823.91	268.98	0.194823	76.3265	60.5131	746.531	144.601	58.2638	1823.91	0.194823	60.5131	1469.39	59.3124	136.814	44.8749	8.74454	23237.1	731.718	0.043491		0
Urine excretion rate	kg d-1	1.5	Urine	0	0	0.95
Bile excretion rate	kg d-1	0.6	Bile	0.005	0.002	0.97
Body mass	kg	70	Blood	0.002	0.078	0.92
Blood mass	kg	4.9	Liver	0.03	0.23	0.73
Liver mass	kg	1.8	Kidney	0.007	0.193	0.79
Kidney mass	kg	0.3	Muscle	0	0.2	0.79
Lung mass	kg	1.1	Fat	0.8	0	0.2
Fat mass	kg	15	Lung	0.015	0.134	0.837
Muscle mass	kg	45.5
Liver blood flow	kg d-1	1634
Kidney blood flow	kg d-1	1318
Lung blood flow	kg d-1	216
Fat blood flow	kg d-1	374
Muscle blood flow	kg d-1	3658
[truncated: 1 more columns]
